# Supplementary material for: An integrated model system to gain mechanistic insights into biofilm-associated antimicrobial resistance in Pseudomonas aeruginosa MPAO1
Source: PubMed Central journal article supplement (PMC7603352; doi:10.1038/s41522-020-00154-8), 2020-10-30
Supplement: 41522_2020_154_MOESM1_ESM.pdf [file 41522_2020_154_MOESM1_ESM.pdf]

# Supplemental Material

## Table of Contents

---

|                                                                                                                                                  |    |
|--------------------------------------------------------------------------------------------------------------------------------------------------|----|
| <b>Supplementary Table 1.</b> Genome characteristics of <i>P. aeruginosa</i> MPAO1 and PAO1-UW. ...                                              | 2  |
| <b>Supplementary Data 1.</b> Detailed annotation & integrated information for data mining (Master table). .....                                  | 3  |
| <b>Supplementary Figure 1.</b> The genome of strain MPAO1/P1 contains more interrupted genes.                                                    | 4  |
| <b>Supplementary Data 2.</b> Summary of SNP differences between strain MPAO1 and PAO1.....                                                       | 5  |
| <b>Supplementary Data 3.</b> List of shared and specific gene clusters for strains PAO1 and MPAO1. ....                                          | 5  |
| <b>Supplementary Table 2.</b> Gene ontology categories among 232 unique MPAO1 gene clusters. ....                                                | 6  |
| <b>Supplementary Table 3.</b> Re-mapping of Tn-seq data against the MPAO1 genome leads to a higher percentage of mapped reads. ....              | 7  |
| <b>Supplementary Figure 2.</b> Overview of conditionally essential genes in <i>P. aeruginosa</i> MPAO1. ....                                     | 8  |
| <b>Supplementary Data 4.</b> Summary table of 1117 genes essential in at least one Tn-seq library. ....                                          | 8  |
| <b>Supplementary Table 4.</b> Laminar flow conditions achieved in the biofilm chamber. ....                                                      | 9  |
| <b>Supplementary Table 5.</b> List of <i>P. aeruginosa</i> MPAO1 mutant strains used in this work.....                                           | 10 |
| <b>Supplementary Figure 3.</b> Diagram of the screening protocol to measure biofilm formation and biofilm cell resistance towards colistin. .... | 13 |
| <b>Supplementary Figure 4.</b> Growth kinetics of WT MPAO1 and mutant strains in 96 well plates. ....                                            | 14 |
| <b>Supplementary Figure 5.</b> Rank of estimated protein abundances in planktonic and biofilm cells. ....                                        | 15 |
| <b>Supplementary Figure 6.</b> Several members of the H1-T6SS are upregulated in biofilm. ....                                                   | 17 |
| <b>Supplementary Table 6.</b> Summary table of annotation clusters created for the MPAO1 & PAO1 iPtgxDBs. ....                                   | 18 |
| <b>Supplementary Data 5.</b> Design of the microfluidic chamber as a CAD file. ....                                                              | 18 |
| <b>References</b> .....                                                                                                                          | 19 |

**Supplementary Table 1. Genome characteristics of *P. aeruginosa* MPAO1 and PAO1-UW.**

|                                    | <i>P. aeruginosa</i> MPAO1 | <i>P. aeruginosa</i> PAO1-UW* |
|------------------------------------|----------------------------|-------------------------------|
| Genbank accession #                | CP027857                   | NC_002516                     |
| No. chromosomes (plasmids)         | 1 (0)                      | 1 (0)                         |
| Size (bp)                          | 6,275,467                  | 6,264,404                     |
| G+C content (%)                    | 66.5                       | 66.6                          |
| Coverage (PacBio)                  | 180x                       | n.a.                          |
| Coverage (Illumina MiSeq)          | 101x                       | n.a.                          |
| Total No. of genes                 | 5,926                      | 5,697                         |
| No. of protein-coding genes (CDSs) | 5,799                      | 5,572                         |
| No. of rRNA operons (16S, 23S, 5S) | 4,4,4                      | 4,4,4                         |
| No. of tRNA genes                  | 63                         | 63                            |
| No. of pseudogenes                 | 48                         | 19                            |
| No. of ncRNA, tmRNA                | 4, -                       | 29, 1                         |
| No. of 4.5S rRNA                   | -                          | 1                             |
| Prophages                          | 3                          | 2                             |

\*We interchangeably use *P. aeruginosa* PAO1 or PAO1-UW.

### **Supplementary Data 1. Detailed annotation & integrated information for data mining (Master table).**

See separate Excel file. The file contains detailed annotation for all 5,799 annotated MPAO1 CDS. Furthermore, it includes information whether the genes are conserved or unique compared to *P. aeruginosa* PAO1, the respective PAO1 homolog (and gene name, where applicable), the genes missed in three Illumina short read-based assemblies of MPAO1 strains [1] [2], gene essentiality status from our study and previous data sets [3] [4], protein expression evidence from our study (biofilm versus planktonic growth), and additional information about protein domains, families, patterns, signatures, a Gene Ontology (GO) classification, a prediction of subcellular localization, lipoproteins, etc. We did not specifically assess short MPAO1-unique genes, whose gene essentiality status is more difficult to robustly classify. Instead, we added a proteogenomics element to enable identification of novel short proteins (see main article).

## Supplementary Figure 1. The genome of strain MPAO1/P1 contains more interrupted genes.

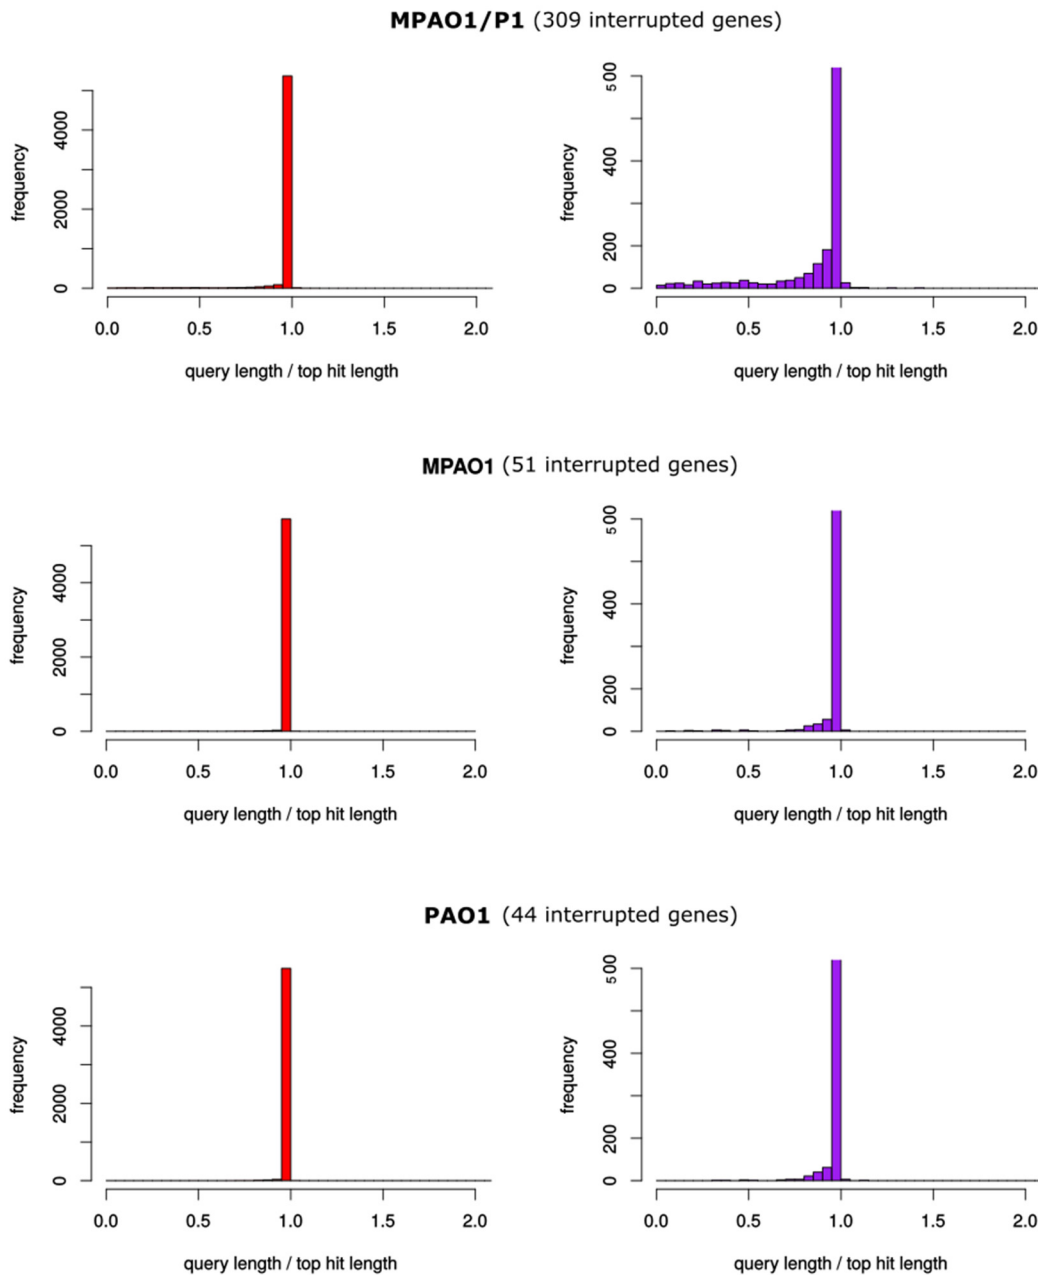

An analysis with Ideel (<https://github.com/mw55309/ideel>) uncovered large differences of the number of predicted pseudogenes/interrupted genes, which can serve as one parameter to estimate genome completeness. For MPAO1/P1 (5,791 CDS), about six times as many putative pseudogenes/interrupted genes were identified compared to the complete MPAO1 (5,799 CDS) and PAO1-UW (5,572 CDS) genome sequences (MPAO1/P1: 309; MPAO1: 51; PAO1-UW: 44). A complete genome typically shows a narrow peak around 1, i.e., most of the CDS have a full length BlastP hit against the respective UniProt entry, and a shallow tail of the distribution towards the left (see zoomed region in the right plots).

## **Supplementary Data 2. Summary of SNP differences between strain MPAO1 and PAO1.**

The table (see separate Excel file) lists the differences between our complete genome assembly of MPAO1 and the genome sequence of PAO1-UW [5], the PAO1 type strain. We could confirm the 16 SNPs reported previously for both strains [6], one SNP only in MPAO1 and six SNPs observed as base exchanges in both strains. We could also confirm nine of the SNPs that had been reported for the PAO1 DSM strain only [6] (synonymous substitutions in Phage pf1 protein) which are located at the beginning of the inversion region, one SNP in transcriptional regulator MexT and one intergenic SNP at position 5,033,102 of the MPAO1 genome. In addition, we observed a total of 176 additional SNPs and INDELS between PAO1 and MPAO1 that were not reported by Klockgether and colleagues, as their comparison had focused on selected genomic regions of the two strains [6].

## **Supplementary Data 3. List of shared and specific gene clusters for strains PAO1 and MPAO1.**

Gene clusters specific to either PAO1 (21) or MPAO1 (232), and those shared between the two strains (5,534) as returned from an analysis with Roary [7] are listed in a separate Excel file, along with genomic coordinates, annotation and COG classification. For the MPAO1-specific gene clusters, information about essentiality was computed based on the very important dataset by Lee and colleagues and using the scripts they provided in their Supplementary Material [3].

**Supplementary Table 2. Gene ontology categories among 232 unique MPAO1 gene clusters.**

| GO accession              | GO description                                 | Unique genes                          | total proteins annot. | unique proteins annot. | p-value  |
|---------------------------|------------------------------------------------|---------------------------------------|-----------------------|------------------------|----------|
| <b>Biological Process</b> |                                                |                                       |                       |                        |          |
| GO:0006468                | protein phosphorylation                        | MPAO1_11765, MPAO1_24875, MPAO1_24880 | 10                    | 3                      | 2.90E-05 |
| GO:0030153                | bacteriocin immunity                           | MPAO1_05695, MPAO1_20105              | 5                     | 2                      | 0.00041  |
| GO:0006571                | tyrosine biosynthetic process                  | MPAO1_09400                           | 1                     | 1                      | 0.00664  |
| GO:0006470                | protein dephosphorylation                      | MPAO1_24870                           | 5                     | 1                      | 0.03276  |
| GO:0015074                | DNA integration                                | MPAO1_24800                           | 7                     | 1                      | 0.04557  |
| <b>Molecular Function</b> |                                                |                                       |                       |                        |          |
| GO:0004672                | protein kinase activity                        | MPAO1_11765, MPAO1_24875, MPAO1_24880 | 85                    | 3                      | 0.0226   |
| GO:0003866                | 3-phosphoshikimate 1-carboxyvinyltransferase   | MPAO1_09400                           | 1                     | 1                      | 0.0073   |
| GO:0004308                | exo-alpha-sialidase activity                   | MPAO1_11350                           | 1                     | 1                      | 0.0073   |
| GO:0004665                | prephenate dehydrogenase (NADP+) activity      | MPAO1_09400                           | 1                     | 1                      | 0.0073   |
| GO:0008849                | enterochelin esterase activity                 | MPAO1_13245                           | 1                     | 1                      | 0.0073   |
| GO:0008977                | prephenate dehydrogenase (NAD+) activity       | MPAO1_09400                           | 1                     | 1                      | 0.0073   |
| GO:0008998                | ribonucleoside-triphosphate reductase activity | MPAO1_16050                           | 2                     | 1                      | 0.0145   |
| GO:0004722                | protein serine/threonine phosphatase activity  | MPAO1_24870                           | 3                     | 1                      | 0.0217   |
| GO:0015643                | toxic substance binding                        | MPAO1_20105                           | 3                     | 1                      | 0.0217   |
| GO:0005102                | receptor binding                               | MPAO1_24810                           | 4                     | 1                      | 0.0288   |
| GO:0016805                | dipeptidase activity                           | MPAO1_06140                           | 4                     | 1                      | 0.0288   |

GO categories for which only one gene among the unique MPAO1 genes was affected are shown in gray

**Supplementary Table 3. Re-mapping of Tn-seq data against the MPAO1 genome leads to a higher percentage of mapped reads.**

| Library Name | # mapped reads |            | % increase mapped reads | # unique insertion sites |         | % increase unique insertion sites |
|--------------|----------------|------------|-------------------------|--------------------------|---------|-----------------------------------|
|              | PAO1-UW        | MPAO1      |                         | PAO1-UW                  | MPAO1   |                                   |
| LB-1_Rep1    | 2,095,460      | 2,099,090  | 0.17%                   | 92,731                   | 92,938  | 0.22%                             |
| LB-1_Rep2    | 13,409,799     | 13,427,972 | 0.14%                   | 89,678                   | 89,884  | 0.23%                             |
| LB-1_Rep3    | 8,970,876      | 8,990,866  | 0.22%                   | 64,155                   | 64,298  | 0.22%                             |
| LB-2_Rep1    | 14,495,458     | 14,546,760 | 0.35%                   | 82,060                   | 82,239  | 0.22%                             |
| LB-2_Rep2    | 18,630,794     | 18,648,695 | 0.10%                   | 82,441                   | 82,655  | 0.26%                             |
| LB_3         | 23,922,898     | 23,952,863 | 0.13%                   | 110,102                  | 110,331 | 0.21%                             |
| Minimal-1    | 27,740,278     | 27,770,384 | 0.11%                   | 193,648                  | 194,051 | 0.21%                             |
| Minimal-2    | 13,365,514     | 13,383,055 | 0.13%                   | 204,750                  | 205,193 | 0.22%                             |
| Minimal-3    | 6,441,754      | 6,449,398  | 0.12%                   | 250,831                  | 251,570 | 0.29%                             |
| Sputum-1     | 5,630,125      | 5,635,321  | 0.09%                   | 78,706                   | 78,921  | 0.27%                             |
| Sputum-2     | 7,609,070      | 7,617,184  | 0.11%                   | 181,365                  | 181,737 | 0.21%                             |
| Sputum-3     | 14,491,394     | 14,508,287 | 0.12%                   | 48,809                   | 48,930  | 0.25%                             |
| Sputum-4     | 2,991,136      | 2,994,255  | 0.10%                   | 91,856                   | 92,035  | 0.19%                             |
| HumanSerum   | 754,467        | 755,143    | 0.09%                   | 127,543                  | 127,808 | 0.21%                             |
| 0.1XLB       | 8,735,565      | 8,743,902  | 0.10%                   | 121,430                  | 121,679 | 0.21%                             |
| BHI          | 4,438,845      | 4,443,736  | 0.11%                   | 174,419                  | 174,796 | 0.22%                             |

As expected, consistently higher percentages of mapped reads were achieved when mapping the Tn-seq datasets to the complete genome assembly of *P. aeruginosa* strain MPAO1 compared to mapping it to the reference strain PAO1-UW.

**Supplementary Figure 2. Overview of conditionally essential genes in *P. aeruginosa* MPAO1.**

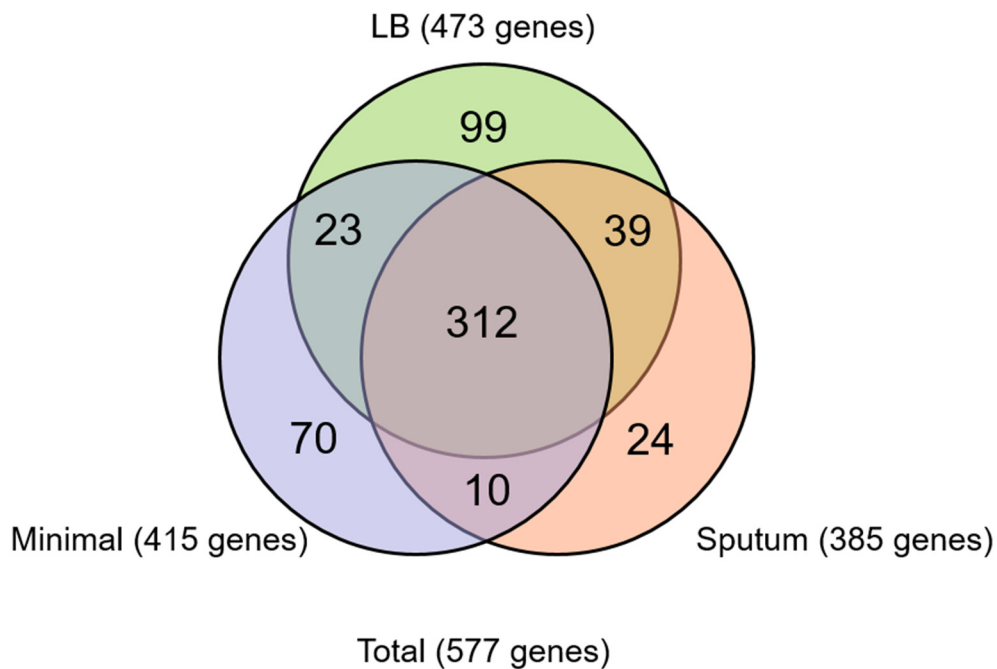

Using the scripts released by Lee and colleagues [3], Tn-seq data were re-mapped to our complete MPAO1 genome and compared with data published, i.e., the set of genes essential in either one of the three conditions sputum, minimal medium and LB medium (577 “all essential genes”), as well as the 312 genes essential in all 3 categories (“general essential genes”). This analysis was close to the original results. Due to the higher mapping success of reads to the complete genome sequence, we identified 39 MPAO1-unique “all essential genes” in the MPAO1 genome (Table 2 and Table S5). Overall, 1117 genes were identified as essential in at least one Tn-seq library; thereof, 136 were MPAO1-unique genes (see Table S7). Six of the MPAO1-unique genes were general essential genes.

**Supplementary Data 4. Summary table of 1117 genes essential in at least one Tn-seq library.**

[See separate Excel file.](#) For completeness, we also show the MPAO1-unique genes that were identified as essential in at least one of the sixteen Tn-seq samples (136; Table S7). The second column shows in how many of the 16 samples a respective gene was called essential. The last three columns indicate the subset of 577 genes essential in at least one of the three primary growth conditions (LB, minimal and sputum), and the subset of 312 genes essential in all three primary growth conditions, i.e., general essential genes (see Methods).



**Supplementary Table 4. Laminar flow conditions achieved in the biofilm chamber.**

The flow in the flow chamber had a defined laminar flow. The calculated Reynolds Number (see formulas below table) was 0.103 given a volumetric flow rate 5  $\mu\text{L}/\text{min}$ , pressure 0.0108 mbar, the channel specifications given below, and correcting for the viscosity and density of water at 37  $^{\circ}\text{C}$ .

| Initial Conditions        |                                                                     |
|---------------------------|---------------------------------------------------------------------|
| Channel geometry          | rectangular                                                         |
| Channel height            | 200 $\mu\text{m}$                                                   |
| Channel width             | 2000 $\mu\text{m}$                                                  |
| Channel length            | 30 mm                                                               |
| Hydraulic diameter (D)    | 363.64 $\mu\text{m}$                                                |
| Fluid viscosity ( $\mu$ ) | 0.73 cP (Pa.s / $10^3$ )                                            |
| Fluid density (d)         | 0.993 $\text{g}/\text{cm}^3$ ( $\text{kg}/\text{m}^3 \times 10^3$ ) |
| Results                   |                                                                     |
| Pressure                  | 0.0107652 mbar                                                      |
| Flow rate (Q)             | 5 $\mu\text{L}/\text{min}$                                          |
| Flow velocity (v)         | 0.000208333 m/s                                                     |
| Reynolds number (Re)      | 0.103051 ( <b>laminar flow</b> )                                    |

$$Re = \frac{d * D * v}{\mu}$$

$$D = \frac{4A}{P}$$

A: section area

P: wetted perimeter

$$v = \frac{Q}{A}$$

**Supplementary Table 5. List of *P. aeruginosa* MPAO1 mutant strains used in this work.**

All mutants are from the UW Genome Center *P. aeruginosa* MPAO1 transposon mutant library (laboratory of Prof. Dr. Colin Manoil). Listed are: the name of the mutant strain, the identifier of the respective gene in PAO1-UW, the MPAO1 locus tag, the gene name and a putative function. Note: gene names in the UW library are listed as PA0160-G03::ISphoA/hah (given here for strain PW1274 as an example). Most clones are from the 96-well plate with the *arnB* mutant strain (PW7021, PA3552); several additional strains used as positive/negative controls for biofilm formation and to validate selected genes of interest are shown in dark blue.

| Strain name | PAO1 gene identifier | MPAO1 locus tag | Gene name     | Putative function                                      |
|-------------|----------------------|-----------------|---------------|--------------------------------------------------------|
| PW1156      | <b>PA0095</b>        | MPAO1_00520     | <i>vgrG1b</i> | conserved hypothetical protein                         |
| PW1274      | <b>PA0160</b>        | MPAO1_00860     |               | hypothetical protein                                   |
| PW9283      | <b>PA0195</b>        | MPAO1_01040     | <i>pntAA</i>  | putative NAD(P) transhydrogenase, subunit alpha part 1 |
| PW1536      | <b>PA0292</b>        | MPAO1_01545     | <i>aguA</i>   | agmatine deiminase                                     |
| PW1635      | <b>PA0344</b>        | MPAO1_01825     |               | hypothetical protein                                   |
| PW7893      | <b>PA0357</b>        | MPAO1_01890     | <i>mutM</i>   | formamidopyrimidine-DNA glycosylase                    |
| PW1722      | <b>PA0391</b>        | MPAO1_02065     |               | hypothetical protein                                   |
| PW1808      | <b>PA0440</b>        | MPAO1_02325     |               | probable oxidoreductase                                |
| PW1871      | <b>PA0476</b>        | MPAO1_02520     |               | probable permease                                      |
| PW2290      | <b>PA0711</b>        | MPAO1_22480     |               | hypothetical protein                                   |
| PW2385      | <b>PA0761</b>        | MPAO1_22195     | <i>nadB</i>   | L-aspartate oxidase                                    |
| PW2642      | <b>PA0898</b>        | MPAO1_21485     | <i>aruD</i>   | succinylglutamate 5-semialdehyde dehydrogenase         |
| PW2661      | <b>PA0914</b>        | MPAO1_21390     |               | hypothetical protein                                   |
| PW3188      | <b>PA1211</b>        | MPAO1_19795     |               | hypothetical protein                                   |
| PW3211      | <b>PA1224</b>        | MPAO1_19730     |               | probable NAD(P)H dehydrogenase                         |
| PW3242      | <b>PA1245</b>        | MPAO1_19625     | <i>aprX</i>   | hypothetical protein [8]                               |
| PW3395      | <b>PA1320</b>        | MPAO1_19225     | <i>cyoD</i>   | cytochrome o ubiquinol oxidase subunit IV              |
| PW3497      | <b>PA1373</b>        | MPAO1_18945     | <i>fabF2</i>  | 3-oxoacyl-acyl carrier protein synthase II             |
| PW3499      | <b>PA1374</b>        | MPAO1_18940     |               | hypothetical protein                                   |
| PW3660      | <b>PA1467</b>        | MPAO1_18470     |               | hypothetical protein                                   |
| PW3679      | <b>PA1486</b>        | MPAO1_18370     |               | hypothetical protein                                   |
| PW3738      | <b>PA1518</b>        | MPAO1_18205     |               | conserved hypothetical protein                         |
| PW3859      | <b>PA1599</b>        | MPAO1_17765     |               | probable transcriptional regulator                     |
| PW3904      | <b>PA1629</b>        | MPAO1_17615     |               | probable enoyl-CoA hydratase/isomerase                 |
| PW4005      | <b>PA1693</b>        | MPAO1_17275     | <i>pscR</i>   | translocation protein in type III secretion            |

|        |               |             |              |                                                          |
|--------|---------------|-------------|--------------|----------------------------------------------------------|
| PW4095 | <b>PA1755</b> | MPAO1_16955 |              | hypothetical protein                                     |
| PW4171 | <b>PA1804</b> | MPAO1_16665 | <i>hupB</i>  | DNA-binding protein HU                                   |
| PW4255 | <b>PA1855</b> | MPAO1_16390 |              | hypothetical protein                                     |
| PW4329 | <b>PA1900</b> | MPAO1_16160 | <i>phzB2</i> | probable phenazine biosynthesis protein                  |
| PW4474 | <b>PA1997</b> | MPAO1_15660 |              | probable AMP-binding enzyme                              |
| PW4590 | <b>PA2084</b> | MPAO1_15180 |              | probable asparagine synthetase                           |
| PW4774 | <b>PA2216</b> | MPAO1_14460 |              | conserved hypothetical protein                           |
| PW4798 | <b>PA2232</b> | MAPO1_14370 | <i>pslB</i>  | probable phosphomannose isomerase/GDP-mannose            |
| PW4975 | <b>PA2361</b> | MPAO1_13710 |              | hypothetical protein                                     |
| PW5204 | <b>PA2510</b> | MPAO1_12945 | <i>catR</i>  | transcriptional regulator CatR                           |
| PW5263 | <b>PA2542</b> | MPAO1_12765 |              | conserved hypothetical protein                           |
| PW5552 | <b>PA2716</b> | MPAO1_11820 |              | probable FMN oxidoreductase                              |
| PW5647 | <b>PA2774</b> | MPAO1_11460 |              | hypothetical protein                                     |
| PW5732 | <b>PA2825</b> | MPAO1_11185 | <i>ospR</i>  | probable transcriptional regulator                       |
| PW5757 | <b>PA2838</b> | MPAO1_11120 |              | probable transcriptional regulator                       |
| PW5923 | <b>PA2928</b> | MPAO1_10660 |              | hypothetical protein                                     |
| PW6078 | <b>PA3029</b> | MPAO1_10130 | <i>moaB2</i> | molybdopterin biosynthetic protein B2                    |
| PW6080 | <b>PA3030</b> | MPAO1_10125 | <i>mobA</i>  | molybdopterin-guanine dinucleotide biosynthesis protein  |
| PW6141 | <b>PA3064</b> | MPAO1_09940 | <i>peIA</i>  | PeIA                                                     |
| PW6275 | <b>PA3137</b> | MPAO1_09535 |              | probable major facilitator superfamily (MFS) transporter |
| PW6504 | <b>PA3279</b> | MPAO1_08785 | <i>oprP</i>  | Phosphate-specific outer membrane porin OprP precursor   |
| PW6554 | <b>PA3305</b> | MPAO1_08630 |              | hypothetical protein                                     |
| PW6689 | <b>PA3374</b> | MPAO1_08270 |              | conserved hypothetical protein                           |
| PW6719 | <b>PA3391</b> | MPAO1_08185 | <i>nosR</i>  | regulatory protein NosR                                  |
| PW6755 | <b>PA3410</b> | MPAO1_08085 |              | probable sigma-70 factor, ECF subfamily                  |
| PW6868 | <b>PA3470</b> | MPAO1_07770 |              | hypothetical protein                                     |
| PW6935 | <b>PA3507</b> | MPAO1_07575 |              | probable short-chain dehydrogenase                       |
| PW6985 | <b>PA3534</b> | MPAO1_07440 |              | probable oxidoreductase                                  |
| PW7021 | <b>PA3552</b> | MPAO1_07345 | <i>arnB</i>  | ArnB                                                     |
| PW7067 | <b>PA3574</b> | MPAO1_07230 | <i>nalD</i>  | probable transcriptional regulator                       |
| PW7125 | <b>PA3606</b> | MPAO1_07045 |              | conserved hypothetical protein                           |
| PW7145 | <b>PA3618</b> | MPAO1_06985 |              | conserved hypothetical protein                           |
| PW7383 | <b>PA3772</b> | MPAO1_06190 |              | hypothetical protein                                     |
| PW7530 | <b>PA3870</b> | MPAO1_05670 | <i>moaA1</i> | molybdopterin biosynthetic protein A1                    |
| PW7566 | <b>PA3890</b> | MPAO1_05560 |              | probable permease of ABC transporter                     |
| PW7664 | <b>PA3939</b> | MPAO1_05300 |              | hypothetical protein                                     |
| PW7797 | <b>PA4018</b> | MPAO1_04895 |              | hypothetical protein                                     |
| PW8020 | <b>PA4143</b> | MPAO1_04250 |              | probable toxin transporter                               |
| PW8169 | <b>PA4224</b> | MPAO1_03835 | <i>pchG</i>  | pyochelin biosynthetic protein PchG                      |
| PW8212 | <b>PA4282</b> | MPAO1_22735 |              | probable exonuclease                                     |

|         |               |             |              |                                                       |
|---------|---------------|-------------|--------------|-------------------------------------------------------|
| PW8258  | <b>PA4305</b> | MPAO1_22850 | <i>rcpC</i>  | RcpC                                                  |
| PW8322  | <b>PA4338</b> | MPAO1_23025 |              | hypothetical protein                                  |
| PW8365  | <b>PA4362</b> | MPAO1_23150 |              | hypothetical protein                                  |
| PW8394  | <b>PA4378</b> | MPAO1_23230 | <i>inaA</i>  | InaA protein                                          |
| PW8466  | <b>PA4434</b> | MPAO1_23525 |              | probable oxidoreductase                               |
| PW8707  | <b>PA4578</b> | MPAO1_24275 |              | hypothetical protein                                  |
| PW8795  | <b>PA4625</b> | MPAO1_24535 | <i>cdrA</i>  | hypothetical protein [9]                              |
| PW8936  | <b>PA4711</b> | MPAO1_25105 |              | hypothetical protein                                  |
| PW8957  | <b>PA4721</b> | MPAO1_25155 |              | conserved hypothetical protein                        |
| PW8965  | <b>PA4726</b> | MPAO1_25185 | <i>cbrB</i>  | two-component response regulator CbrB                 |
| PW9094  | <b>PA4812</b> | MPAO1_25645 | <i>fdnG</i>  | formate dehydrogenase-O, major subunit                |
| PW9164  | <b>PA4856</b> | MPAO1_25880 | <i>retS</i>  | regulator of Exopolysaccharide and Type III Secretion |
| PW9226  | <b>PA4888</b> | MPAO1_26040 | <i>desB</i>  | acyl-CoA delta-9-desaturase, DesB                     |
| PW9246  | <b>PA4899</b> | MPAO1_26095 |              | probable aldehyde dehydrogenase                       |
| PW9431  | <b>PA5020</b> | MPAO1_26730 |              | probable acyl-CoA dehydrogenase                       |
| PW9494  | <b>PA5058</b> | MPAO1_26935 | <i>phaC2</i> | poly(3-hydroxyalkanoic acid) synthase 2               |
| PW9509  | <b>PA5073</b> | MPAO1_27010 |              | hypothetical protein                                  |
| PW9793  | <b>PA5219</b> | MPAO1_27780 |              | hypothetical protein                                  |
| PW9815  | <b>PA5234</b> | MPAO1_27860 |              | probable oxidoreductase                               |
| PW9856  | <b>PA5261</b> | MPAO1_28000 | <i>algR</i>  | alginate biosynthesis regulatory protein AlgR         |
| PW9891  | <b>PA5281</b> | MPAO1_28105 |              | probable hydrolase                                    |
| PW9895  | <b>PA5283</b> | MPAO1_28115 |              | probable transcriptional regulator                    |
| PW9934  | <b>PA5304</b> | MPAO1_28225 | <i>dadA</i>  | D-amino acid dehydrogenase, small subunit             |
| PW9970  | <b>PA5324</b> | MPAO1_28325 |              | probable transcriptional regulator                    |
| PW10024 | <b>PA5355</b> | MPAO1_28485 | <i>glcD</i>  | glycolate oxidase subunit GlcD                        |
| PW10082 | <b>PA5384</b> | MPAO1_28660 |              | probable lipolytic enzyme                             |
| PW10153 | <b>PA5423</b> | MPAO1_28855 |              | hypothetical protein                                  |
| PW10195 | <b>PA5442</b> | MPAO1_28970 |              | conserved hypothetical protein                        |
| PW10219 | <b>PA5455</b> | MPAO1_29035 |              | hypothetical protein                                  |
| PW10275 | <b>PA5484</b> | MPAO1_29190 |              | probable two-component sensor                         |

### Supplementary Figure 3. Diagram of the screening protocol to measure biofilm formation and biofilm cell resistance towards colistin.

The assay is performed in 96-well plates in which biofilms of *P. aeruginosa* MPAO1 are observed to grow on the wall of the well at the interface between air/liquid. A side-view of the well is represented in the diagram below to show the behavior of biofilms formed by a resistant strain (MPAO1 WT) and a sensitive one (*arnB* mutant). Biofilm formation is quantified by crystal violet staining after 24h incubation in M9 medium. Biofilm resistance is evaluated by measuring the ability of treated biofilm cells to recover in antibiotic-free M9 medium. The protocol was adapted from [10]. The minimal inhibitory concentration (MIC) was determined using the same bacterial preparation incubated in M9 supplemented with a gradient of colistin concentrations (from 0.25 to 16  $\mu\text{g/mL}$ ). Turbidity was measured after 24h treatment; the MIC was determined as the lowest colistin concentration needed to achieve 90% reduction compared to the turbidity of the untreated condition. The minimal biofilm inhibitory concentration (MBIC) was determined by measuring the recovery of biofilm cells after 24h treatment in M9 medium supplemented with a gradient of colistin concentrations (from 4 to 200  $\mu\text{g/mL}$ ). MBIC 50 and MBIC 90 were determined as the lowest concentration of colistin needed to achieve 50 and 90% reduction of biofilm recovery compared to untreated ones, respectively.

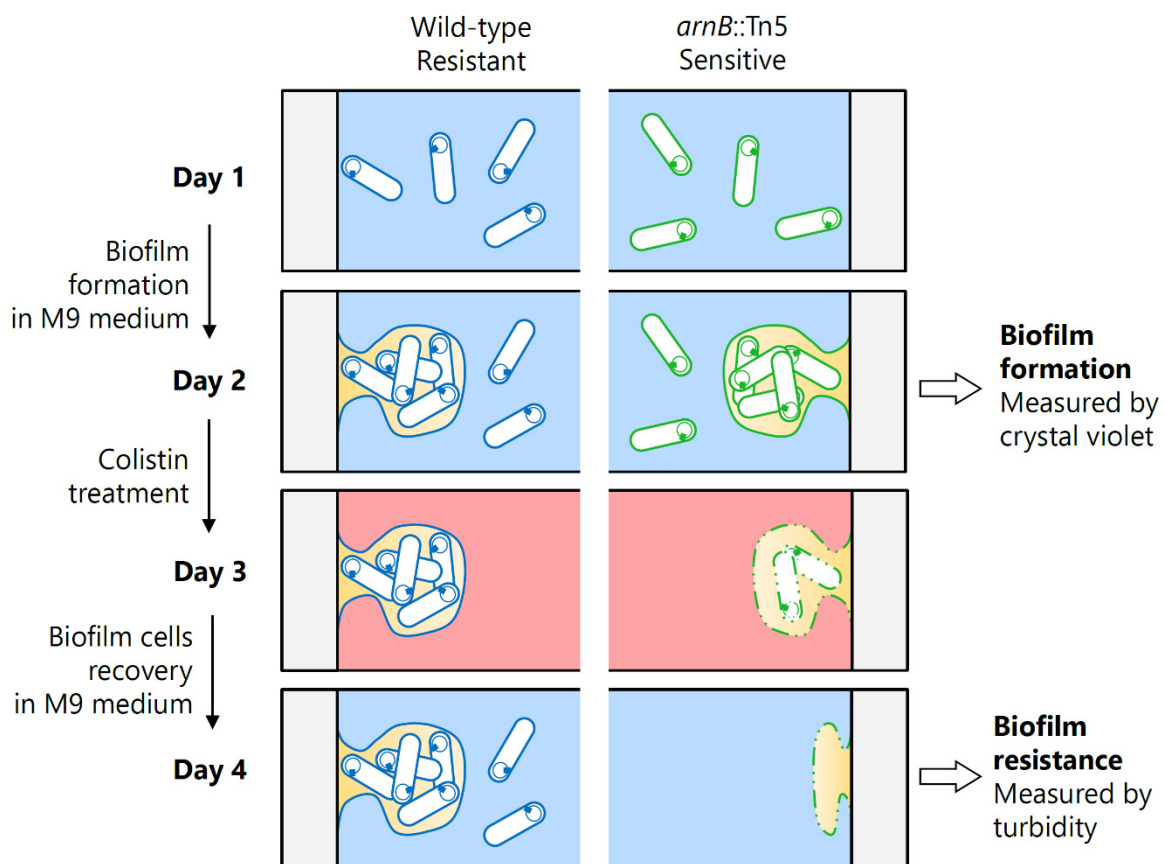

### Supplementary Figure 4. Growth kinetics of WT MPAO1 and mutant strains in 96 well plates.

The growth kinetics of the *cbrB* mutant strain (PA4726; blue triangles) is showing a delayed exponential growth in comparison to the WT and to the other transposon mutants when grown in the 96 well plate. Results represent the mean  $\pm$  standard deviation of one biological experiment (two for WT, *arnB* and *cbrB* mutants) with five technical replicates each.

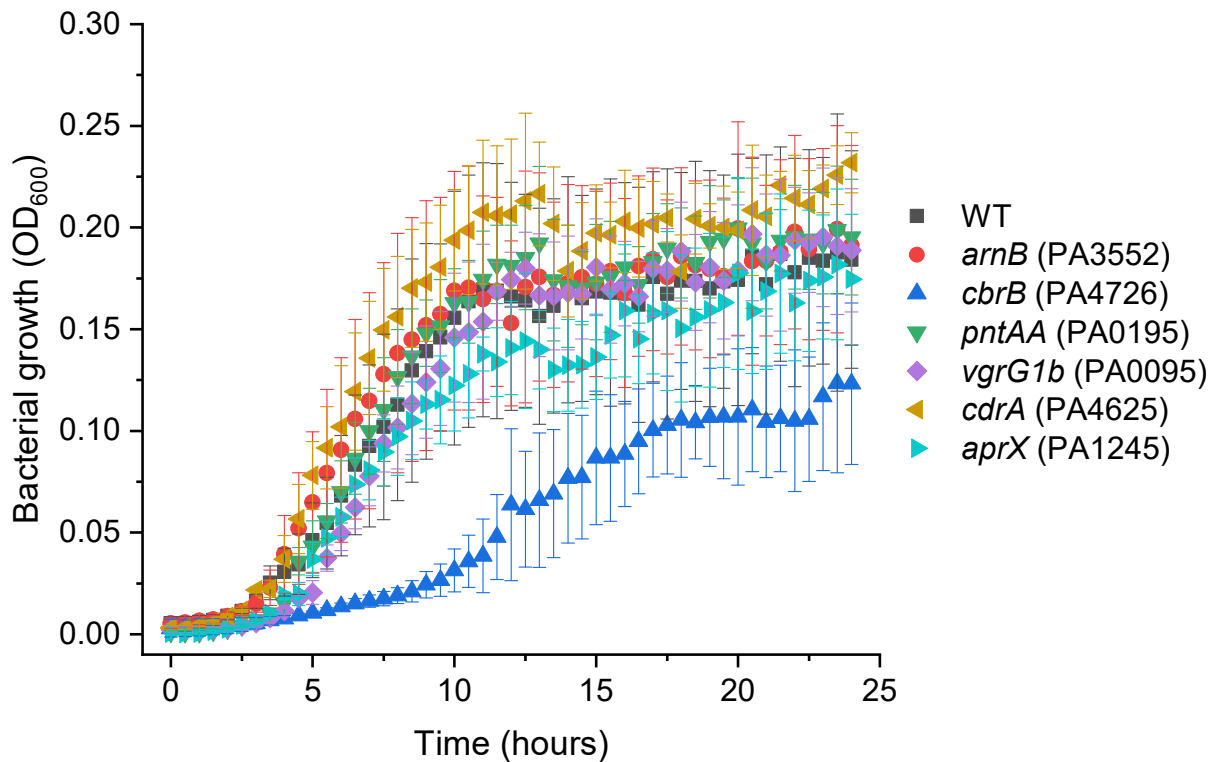

## Supplementary Figure 5. Rank of estimated protein abundances in planktonic and biofilm cells.

We calculated the abundance of all proteins that were expressed under planktonic growth conditions (3A) and in the biofilm flowcell (3B). The respective rank of three top differentially abundant proteins is shown in color (MPAO1\_00520, red; MPAO1\_19625, green; MPAO1\_24535, blue). These proteins are not expressed in planktonic cells (below the threshold), but highly abundant in biofilm cells, with ranks 159, 359 and 956, respectively, and in each replicate (see Table below).

| Protein     | Total # Pept. planktonic | Total # PSMs planktonic | PSM repl. 1 | PSM repl. 2 | PSM repl. 3 | Total # Pept. biofilm | Total # PSMs biofilm | PSM repl. 1 | PSM repl. 2 | PSM repl. 3 | Log 2 FC | padj  |
|-------------|--------------------------|-------------------------|-------------|-------------|-------------|-----------------------|----------------------|-------------|-------------|-------------|----------|-------|
| MPAO1_00520 | 0                        | 0                       | 0           | 0           | 0           | 21                    | 21                   | 7           | 9           | 5           | 5.41     | 0.014 |
| MPAO1_19625 | 1                        | 1                       | 0           | 0           | 1           | 27                    | 43                   | 11          | 16          | 15          | 5.45     | 0.003 |
| MPAO1_24535 | 1                        | 1                       | 0           | 0           | 1           | 79                    | 89                   | 23          | 34          | 32          | 6.54     | 0.000 |

### A.

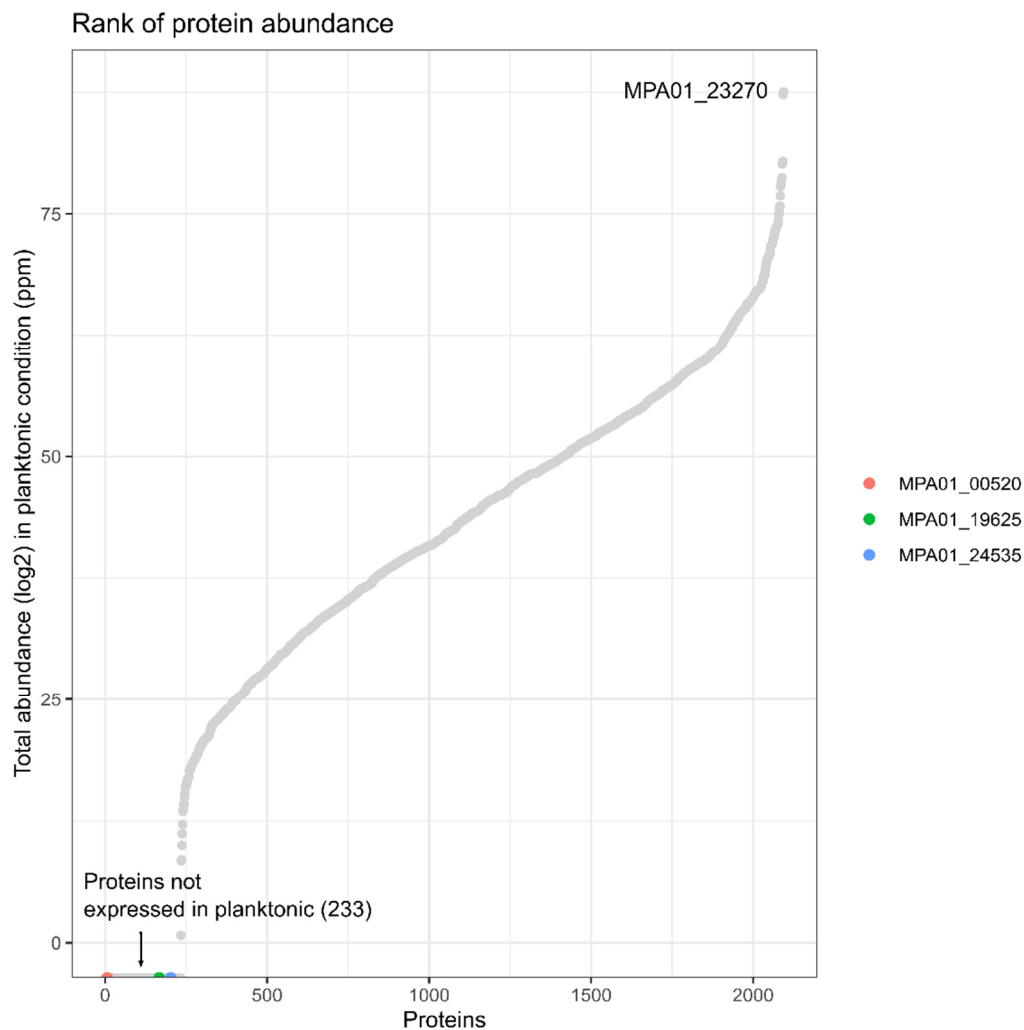

**B.**

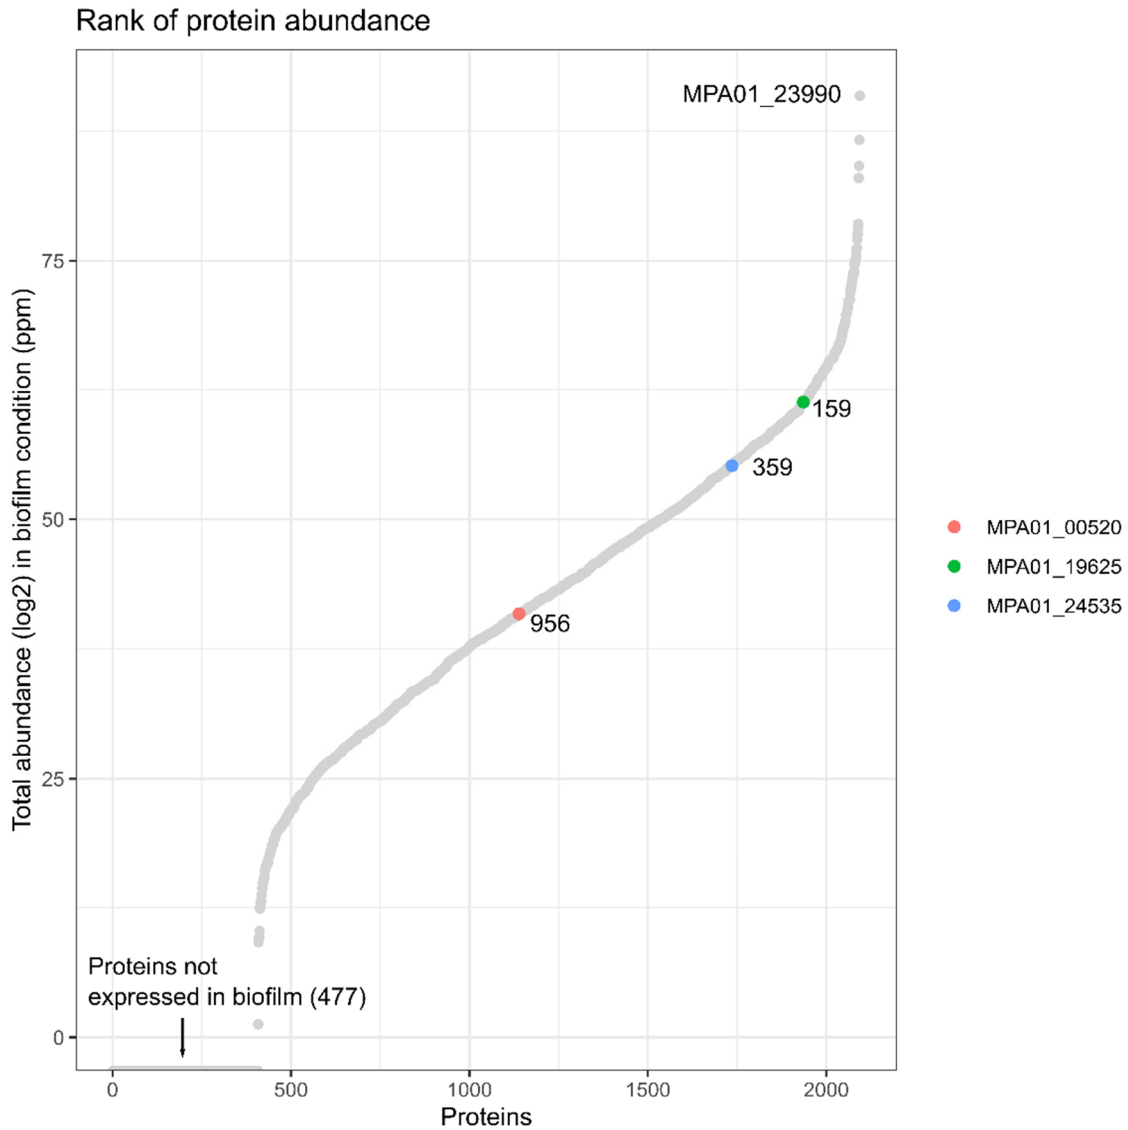

Importantly, all three proteins were identified as expressed in other studies [11-14], two of the PAO1 orthologs are listed as expressed in the Pseudomonas genome database, and protein expression evidence was reported for MPAO1\_19625, also called AprX [8], and MPAO1\_24535, also called CdrA [9].

|                                    | <i>Lampaki et al [11]</i> | <i>Herbst et al [12]</i> | <i>Toyofuku et al [13]</i> | <i>Kumari et al [14]</i> |
|------------------------------------|---------------------------|--------------------------|----------------------------|--------------------------|
|                                    | PAO1                      | MPAO1                    | PAO1                       | PAO1                     |
| MPAO1_00520 (PA0095), <i>Vgr1b</i> | -                         | <b>yes</b>               | <i>no</i>                  | <b>yes</b>               |
| MPAO1_19625 (PA1245), <i>AprX</i>  | -                         | <b>yes</b>               | <i>no</i>                  | <i>no</i>                |
| MPAO1_24535 (PA4625), <i>CdrA</i>  | <b>yes</b>                | <b>yes</b>               | <b>yes</b>                 | <b>yes</b>               |



## Supplementary Figure 6. Several members of the H1-T6SS are upregulated in biofilm.

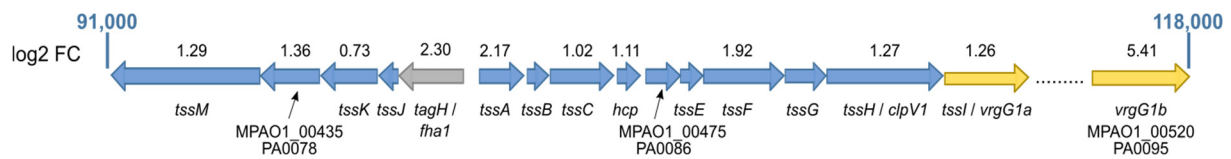

Genomic region of *P. aeruginosa* MPAO1 that shows part of the H1-T6SS region (roughly from nucleotide 91,000-118,000); gene names or MPAO1 locus tags are shown (with the respective PAO1 homolog below). The colors were selected as in 12 and indicate structural elements (blue), vgrGs (yellow) and other known T6SS genes (gray). The shotgun proteomics data (log<sub>2</sub> fold change biofilm over planktonic is shown above the arrows) indicated that several (9 of 14, 64%) of the proteins encoded by structural elements of the H1-T6SS and secreted proteins [15] were upregulated in biofilm cells compared to planktonic cells. The H1-T6SS has been described as “a molecular gun firing toxins (Tse1-Tse7)” and has been implied “to challenge the survival of other bacteria and help *P. aeruginosa* prevail in specific niches” [16]. This specific H1-T6SS has recently been shown to be highly relevant for the ability of *P. aeruginosa* strains to dominate in multi-species biofilms [17]. Notably, all three VgrG proteins that are co-regulated with this T6SS (VgrG1a-c) were upregulated, including VGR1c (MPAO1\_11985; PA2685; 2.53 log<sub>2</sub> FC). In contrast, none of the seven other members of the VgrG family (total of 10) [15] was expressed (see Supplementary **Data 1**).

Our pilot study proteomics dataset covered about 33% of the annotated MPAO1 proteins. This coverage was below that of the extensive proteomics dataset that had allowed to uncover expression evidence for all *Bartonella henselae* Type IV secretion system (T4SS) members [18]. However, that coverage was only be achieved by employing several elaborate fractionation and enrichment strategies, which was beyond the scope of this pilot study. Several of the structural members of the H1-T6SS include shorter proteins and membrane proteins, both of which are more difficult to detect by shotgun proteomics. Furthermore several of the secreted substrates of this H1-T6SS including Tse1 (PA1844, MPAO1\_16450; 465 aa), Tse2 (PA2702, MPAO1\_11900; 477 aa) and Tse3 (PA3484, MPAO1\_07690; 1227 aa) are under tight and selective regulation [19] and were not detected in our study.

**Supplementary Table 6. Summary table of annotation clusters created for the MPAO1 & PAO1 iPtgxDBs.**

**Supplementary Table 6A - MPAO1**

| Annotation source (tag in identifier) | Annotations | Clusters* | New clusters | New reductions | New extensions | Total clusters | Total ids |
|---------------------------------------|-------------|-----------|--------------|----------------|----------------|----------------|-----------|
| RefSeq (refseq)                       | 5,851       | 5,851     | 5,851        | 0              | 0              | 5,851          | 5,851     |
| Prodigal (prod)                       | 5,691       | 5,691     | 55           | 309            | 150            | 5,906          | 6,365     |
| ChemGenome (chemg)                    | 4,616       | 4,616     | 1,703        | 81             | 1,745          | 7,609          | 9,894     |
| <i>In silico</i> ORF (orf)            | 155,710     | 70,655    | 63,065       | 78             | 76,881         | 70,674         | 149,918   |

\* See the original paper for a detailed description of the annotation clusters [20] or also the website [https://iptgxdb.expasy.org/creating\\_iptgxdb/](https://iptgxdb.expasy.org/creating_iptgxdb/) for more information.

The final iPtgxDB contained 146,826 entries, as sequences <6 aa (2,778), i.e., not identifiable with shotgun proteomics, annotated as pseudogenes in all annotations (47), and indistinguishable internal start sites (267) were not considered.

**Supplementary Table 6B - PAO1**

| Annotation source (tag in identifier) | Annotations | Clusters* | New clusters | New reductions | New extensions | Total clusters | Total ids |
|---------------------------------------|-------------|-----------|--------------|----------------|----------------|----------------|-----------|
| RefSeq 2019 (refseq)                  | 5,592       | 5,591     | 5,591        | 0              | 1              | 5,591          | 5,592     |
| RefSeq 2017 (RS17)                    | 5,577       | 5,577     | 45           | 31             | 8              | 5,636          | 5,676     |
| Genoscope (geno)                      | 5,835       | 5,835     | 202          | 11             | 3              | 5,838          | 5,892     |
| Prodigal (prod)                       | 5,681       | 5,681     | 27           | 294            | 160            | 5,865          | 6,373     |
| ChemGenome (chemg)                    | 4,738       | 4,738     | 1,795        | 66             | 1,719          | 7,660          | 9,953     |
| <i>In silico</i> ORF (orf)            | 155,518     | 70,445    | 62,788       | 121            | 76,199         | 70,448         | 149,061   |

The final iPtgxDB contained 145,978 entries, as sequences <6 aa (2,788), i.e., not identifiable with shotgun proteomics, annotated as pseudogenes in all annotations (18), and indistinguishable internal start sites (277) were not considered.

**Supplementary Data 5. Design of the microfluidic chamber as a CAD file.**

See separate DWG file.

## References

1. Olivas, A.D., et al., *Intestinal tissues induce an SNP mutation in Pseudomonas aeruginosa that enhances its virulence: possible role in anastomotic leak*. PLoS One, 2012. **7**(8): p. e44326.
2. Chandler, C.E., et al., *Genomic and Phenotypic Diversity among Ten Laboratory Isolates of Pseudomonas aeruginosa PAO1*. J Bacteriol, 2019. **201**(5): p. pii: e00595-18.
3. Lee, S.A., et al., *General and condition-specific essential functions of Pseudomonas aeruginosa*. Proc Natl Acad Sci U S A, 2015. **112**(16): p. 5189-5194.
4. Turner, K.H., et al., *Essential genome of Pseudomonas aeruginosa in cystic fibrosis sputum*. Proc Natl Acad Sci U S A, 2015. **112**(13): p. 4110-4115.
5. Stover, C.K., et al., *Complete genome sequence of Pseudomonas aeruginosa PAO1, an opportunistic pathogen*. Nature, 2000. **406**(6799): p. 959-964.
6. Klockgether, J., et al., *Genome diversity of Pseudomonas aeruginosa PAO1 laboratory strains*. J Bacteriol, 2010. **192**(4): p. 1113-1121.
7. Page, A.J., et al., *Roary: rapid large-scale prokaryote pan genome analysis*. Bioinformatics, 2015. **31**(22): p. 3691-3693.
8. Duong, F., et al., *The AprX protein of Pseudomonas aeruginosa: a new substrate for the Apr type I secretion system*. Gene, 2001. **262**(1-2): p. 147-53.
9. Borlee, B.R., et al., *Pseudomonas aeruginosa uses a cyclic-di-GMP-regulated adhesin to reinforce the biofilm extracellular matrix*. Mol Microbiol, 2010. **75**(4): p. 827-42.
10. Mah, T.F., *Establishing the minimal bactericidal concentration of an antimicrobial agent for planktonic cells (MBC-P) and biofilm cells (MBC-B)*. J Vis Exp, 2014(83): p. e50854.
11. Lampaki, D., A. Diepold, and T. Glatter, *A Serial Sample Processing Strategy with Improved Performance for in-Depth Quantitative Analysis of Type III Secretion Events in Pseudomonas aeruginosa*. J Proteome Res, 2020. **19**(1): p. 543-553.
12. Herbst, F.A., et al., *Major proteomic changes associated with amyloid-induced biofilm formation in Pseudomonas aeruginosa PAO1*. J Proteome Res, 2015. **14**(1): p. 72-81.
13. Toyofuku, M., et al., *Identification of proteins associated with the Pseudomonas aeruginosa biofilm extracellular matrix*. J Proteome Res, 2012. **11**(10): p. 4906-15.
14. Kumari, H., et al., *LTQ-XL mass spectrometry proteome analysis expands the Pseudomonas aeruginosa AmpR regulon to include cyclic di-GMP phosphodiesterases and phosphoproteins, and identifies novel open reading frames*. J Proteomics, 2014. **96**: p. 328-342.
15. Hachani, A., et al., *Type VI secretion system in Pseudomonas aeruginosa: secretion and multimerization of VgrG proteins*. J Biol Chem, 2011. **286**(14): p. 12317-12327.
16. Allsopp, L.P., et al., *RsmA and AmrZ orchestrate the assembly of all three type VI secretion systems in Pseudomonas aeruginosa*. Proc Natl Acad Sci U S A, 2017. **114**(29): p. 7707-7712.
17. Cheng, Y., et al., *Population dynamics and transcriptomic responses of Pseudomonas aeruginosa in a complex laboratory microbial community*. NPJ Biofilms Microbiomes, 2019. **5**: p. 1.
18. Omasits, U., et al., *Directed shotgun proteomics guided by saturated RNA-seq identifies a complete expressed prokaryotic proteome*. Genome Res, 2013. **23**(11): p. 1916-1927.
19. Hood, R.D., et al., *A type VI secretion system of Pseudomonas aeruginosa targets a toxin to bacteria*. Cell Host Microbe, 2010. **7**(1): p. 25-37.
20. Omasits, U., et al., *An integrative strategy to identify the entire protein coding potential of prokaryotic genomes by proteogenomics*. Genome Res, 2017. **27**(12): p. 2083-2095.
